# Supplementary material
Source: bioRxiv or medRxiv preprint supplement (http://medrxiv.org/highwire/filestream/69562/field_highwire_adjunct_files/1/19008409-2.pdf)
Supplement: Supplementary file [file 19008409-2.pdf]

The role of prison-based interventions for hepatitis C virus (HCV)  
micro-elimination among people who inject drugs in Montréal, Canada:  
Supplementary material S2

---

---

Table S2.1: Posterior distribution of model parameters.

| Parameter                                            | Symbol               | Median | 95%CrI        | Units              |
|------------------------------------------------------|----------------------|--------|---------------|--------------------|
| <i>HCV transmission</i>                              |                      |        |               |                    |
| Transmission rate                                    | $\beta$              | 0.44   | 0.37 – 0.53   | per PY             |
| Degree of assortative mixing                         |                      |        |               |                    |
| Incarceration                                        | $mix_p$              | 0.41   | 0.02 – 0.96   | -                  |
| Injection status                                     | $mix_i$              | 0.55   | 0.05 – 0.97   | -                  |
| Recruitment rate                                     | $\theta$             | 298    | 192 – 346     | people per year    |
| Fibrosis progression rate                            | $\xi$                | 0.027  | 0.025 – 0.029 | metavir units/year |
| HCV Testing rate                                     | $\tau(t)$            | 25.1   | 10.9 – 39.3   | per 100 PY         |
| Rate ratio for HCV risk <sup>‡</sup> on OAT          | $rr_{oat}$           | 0.50   | 0.43 – 0.58   | -                  |
| Rate ratio for HCV risk <sup>‡</sup> among releasees | $\Gamma$             | 1.59   | 1.27 – 2.02   | -                  |
| Rate ratio for mortality among releasees             | $\Pi$                | 7.42   | 5.70 – 9.94   | -                  |
| <i>Incarceration dynamics</i>                        |                      |        |               |                    |
| Incarceration rate <sup>†</sup>                      |                      |        |               |                    |
| 2003                                                 | $\eta_0(2003)$       | 11.5   | 10.7 – 12.4   | per 100 PY         |
| Release rate <sup>†</sup>                            |                      |        |               |                    |
| 2003                                                 | $\eta_1(2003)$       | 779    | 703 – 847     | per 100 PY         |
| <i>Injection dynamics</i>                            |                      |        |               |                    |
| Injection cessation rate                             | $\frac{1}{\delta_0}$ | 0.055  | 0.044 – 0.075 | per year           |

\* HCV: hepatitis C virus, OAT: opioid agonist therapy, PY: Person-Year.

† Only the posterior for 2003 was shown for these two quantities. Similar distributions were observed over the years.

‡ Risk of HCV acquisition and transmission.

Table S2.2: Epidemiological impact of different prison-based interventions scenarios in terms of relative reduction in prevalence, incidence, and fraction of chronic HCV infections prevented between 2018 and 2030, as compared to a status quo and a community treatment scale-up scenarios.

| Scenario                              | Relative reduction in prevalence | Relative reduction in incidence | Prevented fraction |
|---------------------------------------|----------------------------------|---------------------------------|--------------------|
|                                       | %(95%CrI) <sup>‡</sup>           | %(95%CrI)                       | %(95%CrI)          |
| <i>Status quo</i>                     |                                  |                                 |                    |
| Test and treat (PB T-Tx)              | 27 (20–34)                       | 19 (9–28)                       | 7 (4–10)           |
| Test and linkage to care (PB T-L)     | 30 (22–38)                       | 23 (11–33)                      | 9 (5–14)           |
| PB T-Tx + Post-release risk reduction | 32 (25–41)                       | 30 (17–41)                      | 10 (6–17)          |
| PB T-L + Post-release risk reduction  | 36 (28–45)                       | 33 (20–45)                      | 13 (7–20)          |
| <i>Community scale up of DAA</i>      |                                  |                                 |                    |
| Test and treat (PB T-Tx)              | 58 (45–71)                       | 47 (27–62)                      | 14 (7–20)          |
| Test and linkage to care (PB T-L)     | 67 (53–78)                       | 57 (36–70)                      | 19 (11–27)         |
| PB T-Tx + Post-release risk reduction | 68 (53–81)                       | 62 (43–78)                      | 21 (12–32)         |
| PB T-L + Post-release risk reduction  | 75 (61–85)                       | 69 (50–83)                      | 26 (13–36)         |

‡ Numbers in parenthesis represent 95% credible interval

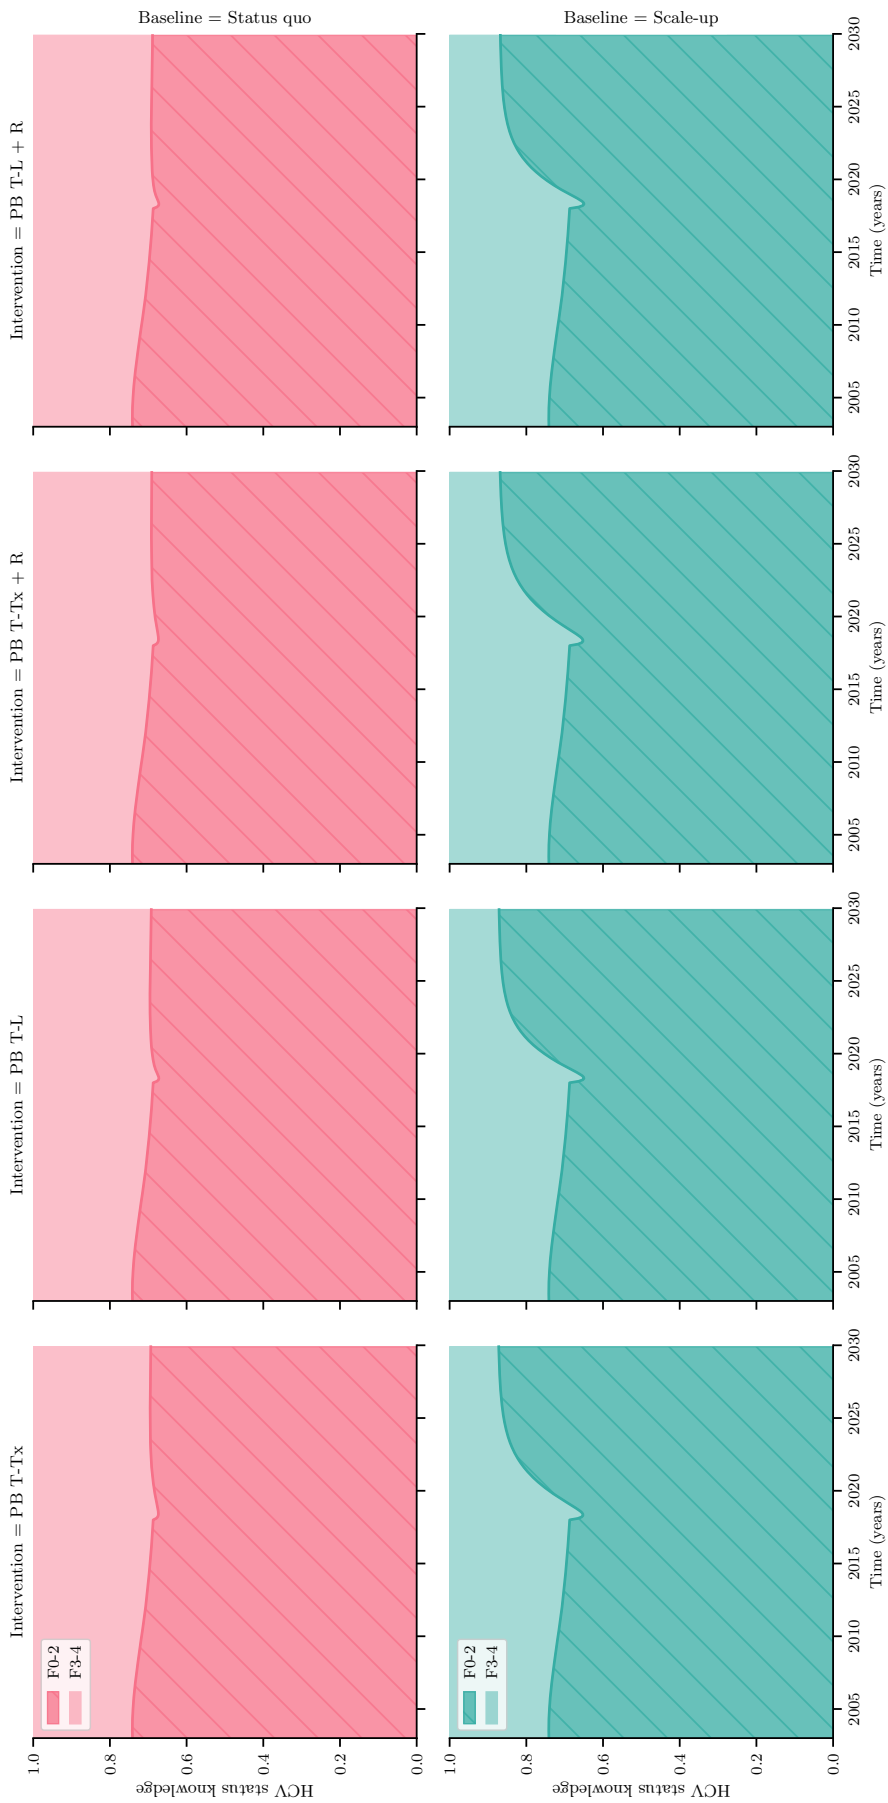

Figure S2.1: Fibrosis levels among all PWID from 2003 to 2030 under (top) the status quo, and (bottom) a community-based DAA scale-up. Where *PB T-Tx* is a test-and-treat intervention in which 90% are tested and 75% of chronic cases are treated while in prison; *PB T-L* is a post-release linkage to care intervention where 90% of people are tested in prison and 75% are treated upon release; *PB T-Tx + Risk* or *PB T-L + Risk* are the same interventions where the elevated post-release risk is halved.

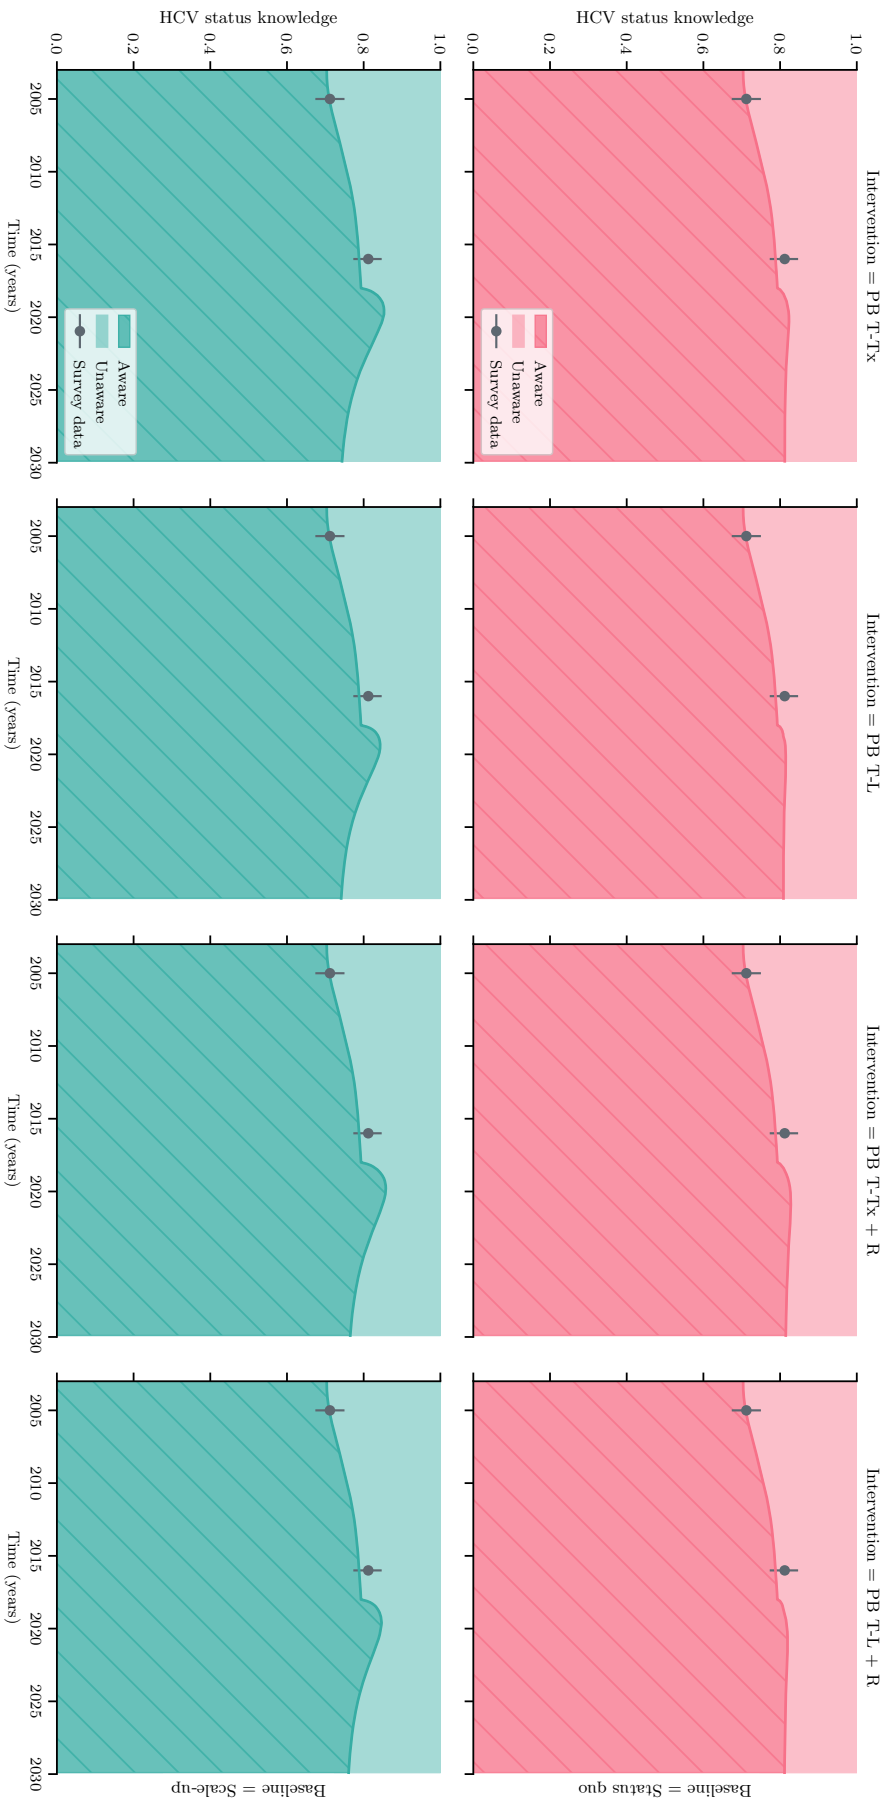

Figure S2.2: Knowledge of HCV status among all PWID from 2003 to 2030 under (top) the status quo, and (bottom) a community-based DAA scale-up. Where *PB T-Tx* is a test-and-treat intervention in which 90% are tested and 75% of chronic cases are treated while in prison; *PB T-L* is a post-release linkage to care intervention where 90% of people are tested in prison and 75% are treated upon release; *PB T-Tx + Risk* or *PB T-L + Risk* are the same interventions where the elevated post-release risk is halved. The data points represent empirical estimates of HCV status among community PWID with 95% confidence interval.
